# Supplementary material for: EA at PC6 Promotes Gastric Motility: Role of Brainstem Vagovagal Neurocircuits
Source: Evid Based Complement Alternat Med. 2019 Jul 15;2019:7457485. doi: 10.1155/2019/7457485 (PMC6662446; doi:10.1155/2019/7457485)
Supplement: Supplementary Materials — Sheet1 (gastric pressure) was used to prove the effect of EA at PC6 on gastric motility (control group, vagotomy group, and sympathectomy group). Sheet2 (nerve discharge) was used to prove the effect of EA at PC6 on autonomic nerve discharge. Sheet3 (microinjection) was used to prove the effect of L-Glu and GABA microinjection into DMV on gastric motility and the effect of EA at PC6 on gastric motility after microinjection of L-Glu and GABA into the DMV. [file 7457485.f1.xlsx]

## Sheet: gastric presure
PC6	0.04	0.05	0.05	0.05	0.05	0.04
PC6	0.22	0.22	0.26	0.31	0.34	0.24
PC6	0.05	0.05	0.07	0.07	0.07	0.08
PC6	0.1	0.1	0.11	0.13	0.15	0.17
PC6	0.19	0.18	0.19	0.2	0.22	0.2
PC6	0.12	0.1	0.16	0.2	0.2	0.15
PC6	0.07	0.08	0.1	0.11	0.12	0.13
PC6	0.1	0.11	0.12	0.18	0.2	0.19
PC6	0.06	0.06	0.07	0.1	0.1	0.07
PC6	0.12	0.16	0.16	0.18	0.2	0.13
PC6	0.13	0.15	0.14	0.14	0.13	0.14
PC6	0.32	0.32	0.33	0.34	0.35	0.33
PC6	0.2	0.25	0.3	0.32	0.3	0.25
PC6V	0.04	0.04	0.04	0.04	0.04	0.04
PC6V	0.03	0.03	0.03	0.03	0.03	0.03
PC6V	0.34	0.33	0.32	0.32	0.33	0.34
PC6V	0.12	0.12	0.12	0.12	0.13	0.12
PC6V	0.1	0.1	0.11	0.1	0.1	0.1
PC6V	0.12	0.12	0.1	0.11	0.12	0.12
PC6V	0.05	0.05	0.05	0.06	0.06	0.06
PC6V	0.1	0.1	0.1	0.11	0.1	0.1
PC6V	0.08	0.07	0.08	0.08	0.09	0.09
PC6V	0.06	0.06	0.07	0.07	0.07	0.07
PC6V	0.1	0.1	0.11	0.11	0.12	0.12
PC6V	0.03	0.03	0.04	0.04	0.04	0.03
PC6V	0.04	0.04	0.04	0.05	0.05	0.04
PC6V	0.12	0.13	0.13	0.14	0.13	0.12
PC6V	0.1	0.1	0.1	0.11	0.1	0.1
PC6V	0.1	0.12	0.12	0.12	0.12	0.12
PC6S	0.05	0.1	0.07	0.09	0.09	0.09
PC6S	0.07	0.15	0.15	0.07	0.09	0.1
PC6S	0.21	0.25	0.24	0.25	0.26	0.3
PC6S	0.18	0.18	0.18	0.18	0.18	0.19
PC6S	0.05	0.08	0.11	0.12	0.15	0.1
PC6S	0.11	0.11	0.12	0.12	0.12	0.12
PC6S	0.05	0.06	0.05	0.05	0.06	0.05
PC6S	0.2	0.22	0.22	0.22	0.22	0.21
PC6S	0.24	0.24	0.35	0.36	0.35	0.35
PC6S	0.13	0.11	0.11	0.11	0.2	0.14
PC6S	0.13	0.13	0.13	0.13	0.15	0.13
PC6S	0.35	0.35	0.4	0.4	0.45	0.4
PC6S	0.28	0.35	0.31	0.3	0.28	0.28
PC6S	0.13	0.15	0.15	0.17	0.18	0.18
PC6S	0.15	0.15	0.18	0.19	0.17	0.16
PC6S	0.1	0.1	0.14	0.13	0.1	0.13
PC6S	0.25	0.3	0.32	0.35	0.38	0.31

## Sheet: nerve discharge
180414	31.51	34.68	36.5	37.48	37.8	37.34
180417	17.72	18.75	20	18.63	19.7	20.38
180419	23.75	27.56	29.17	30	28.16	23.79
180420	26.25	28.16	28.52	31.83	22.87	24.1
180423	13.76	17.1	17.87	18.8	17.9	16.28
180424	28.82	30.03	34.27	29.4	35.13	32.58
	34.52	35.5	35.37	36.26	38.94	33.62
	19.03	21.59	20.39	20.77	22.03	20.97
	20.38	22.93	22.56	21.17	20.35	19.85
	16.56	18.74	19.52	18.68	17.97	17.15
180413	31.03	28.53	28.63	29.72	29.19	30.97
180414	15.12	15.38	14.65	14.7	15.16	15.63
180417	25.64	27.71	27.63	29.32	33.66	33.69
180420	18.53	19.69	19.71	20.53	20.23	17.31
180423	17.47	16.4	17.2	17.6	14.3	14.97
180424	24.93	24.06	23.55	23.3	23.32	24.9
180424	26.62	27.61	27.13	28.06	28	28.08
180516	17.85	19.2	17.34	16.68	17.8	18.16
	31.2	32.81	31.06	31.52	34.29	34
180517	14.95	16.78	15.39	15.42	14.52	15.08

## Sheet: microinjection
Control	L-glu	GABA
6.66667	34.6154	-14.2857
22.2222	60	-11.1111
-4.54545	33.3333	-17.3913
0	35.2941	-45.4545
12.5	14.2857	0
0	66.6667	-41.6667
12.5	71.4286	-40
-10	8.69565	7.14286
Control	L-glu	GABA
5.43478	12.5	55
70	12.5	97.2222
8.33333	20.8333	25
5	30.6818	50
18.75	-3.94737	47.2222
19.4444	52.2727	240
2.27273	-8.33333	4.16667
26.8518	9.67742	10
